# Supplementary material for: MiR-34 inhibits polycomb repressive complex 2 to modulate chaperone expression and promote healthy brain aging
Source: PubMed Central journal article supplement (PMC6180074; doi:10.1038/s41467-018-06592-5), 2018-10-10
Supplement: 41467_2018_6592_MOESM1_ESM.pdf [file 41467_2018_6592_MOESM1_ESM.pdf]

***Supplemental material to:***

**MiR-34 inhibits Polycomb Repressive Complex 2 to modulate chaperone expression and promote healthy brain aging**

Jason R. Kennerdell<sup>1</sup>, Nan Liu<sup>1,2</sup>, and  
Nancy M. Bonini<sup>1\*</sup>

<sup>1</sup>Department of Biology, University of Pennsylvania, Philadelphia, PA 19104

<sup>2</sup> Current Address: Interdisciplinary Research Center on Biology and Chemistry, Shanghai Institute of Organic Chemistry, Chinese Academy of Sciences, Shanghai, 201210 China

\*Corresponding Author

## SUPPLEMENTARY METHODS

### Realtime qPCR:

RNA was purified from dissected brains using Trizol, followed by DNA-free treatment (Ambion, Waltham, MA), followed by RNeasy cleanup (Qiagen, Germantown, MD). Purified RNA (20ng) was used to generate cDNA using the High Capacity cDNA Reverse Transcription kit (Applied Biosystems, Waltham, MA) in a reaction of 10 $\mu$ L. cDNA was diluted 100-fold and 4.5  $\mu$ L was used as template in each realtime PCR reaction with 5 $\mu$ L FAST SYBR Master Mix and 0.5 $\mu$ L 1 $\mu$ M primers. Reactions were run in a ViiA 7 Realtime PCR system. Quantification was done using the  $\Delta\Delta$ Ct method, normalizing to the geometric mean of three endogenous controls (*RpS20*, *pgk*, and *tbp*). Primers, with validation parameters for all amplicons, are listed in SupplementaryTable 3. Data and statistics were analyzed in R.

## SUPPLEMENTAL REFERENCES

1. Liu N, *et al.* The microRNA *miR-34* modulates ageing and neurodegeneration in *Drosophila*. *Nature*. **482**, 519-523 (2012).
2. Paraskevopoulou MD, *et al.* DIANA-microT web server v5.0: service integration into miRNA functional analysis workflows. *Nucleic Acids Res.* **41**, W169-173 (2013).
3. Enright AJ, John B, Gaul U, Tuschl T, Sander C, Marks DS. MicroRNA targets in *Drosophila*. *Genome Biol.* **5**, R1 (2003).
4. Grun D, Wang YL, Langenberger D, Gunsalus KC, Rajewsky N. microRNA target predictions across seven *Drosophila* species and comparison to mammalian targets. *PLoS Comput Biol.* **1**, e13 (2005).
5. Ruby JG, Stark A, Johnston WK, Kellis M, Bartel DP, Lai EC. Evolution, biogenesis, expression, and target predictions of a substantially expanded set of *Drosophila* microRNAs. *Genome Res.* **17**, 1850-1864 (2007).

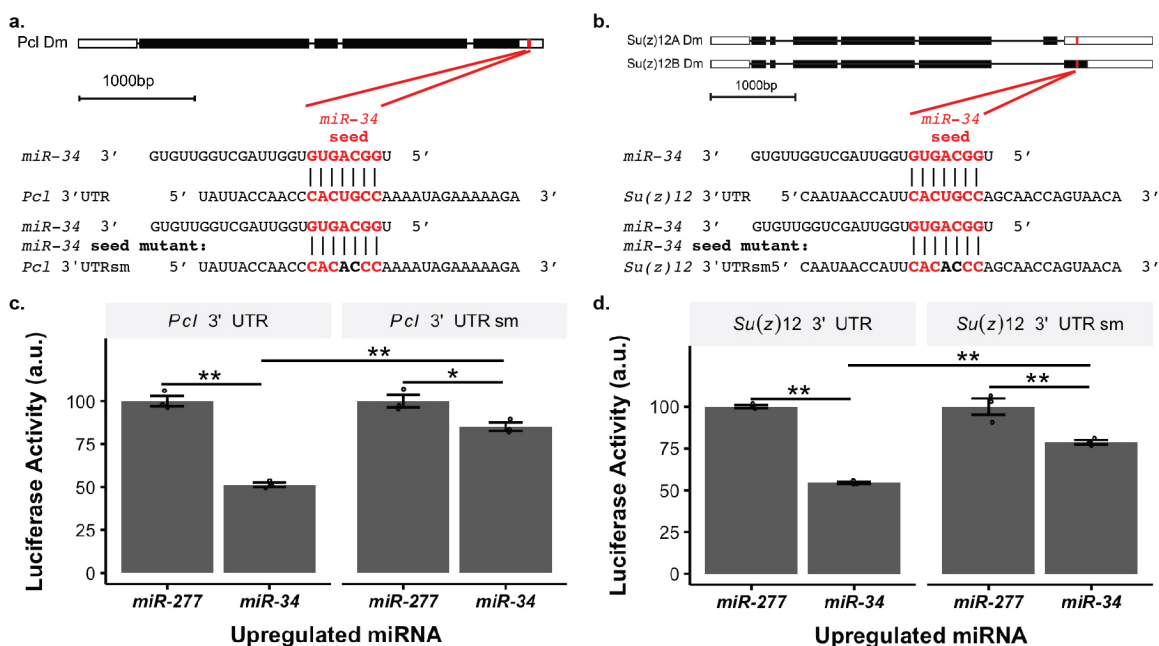

### Supplementary Figure 1: Regulation of *Pcl* and *Su(z)12* 3'UTRs using *miR-277* as control (Associated with Figure 1)

**a, b.** A mutation of two nucleotides (UG to AC) was introduced into the 3'UTR of the *Pcl* gene (**a**), so as to disrupt base-pairing between *miR-34* and the *Pcl* transcript, as well as the (**b**) *Su(z)12* 3'UTR. Seed sequence indicated in red, disruptions indicated in black.

**c, d.** Luciferase assays confirm that *miR-34* targets the *Pcl* and *Su(z)12* 3'UTRs. A reporter construct containing the 3'UTR of (**c**) *Pcl*, or (**d**) *Su(z)12* fused to Renilla luciferase was expressed in *Drosophila* DL1 cells and tested for a response to *miR-34* upregulation. As a control, upregulation of an unrelated miRNA, *miR-277*, was used. Upon upregulation of *miR-34*, luciferase activity decreases in reporters containing the (**c, left**) *Pcl* 3'UTR as well as the (**d, left**) *Su(z)12* 3'UTR. Downregulation of both 3'UTRs was attenuated (**c, d, right**) by a seed sequence mutation (**a, b**). Two-way ANOVA indicated a significant interaction term for the *Pcl* 3'UTR ( $F_{1,8}=28.7$ ,  $p<.001$ ), and *Su(z)12* 3'UTR ( $F_{1,8}=28.5$ ,  $p<.001$ ). \* $p<.05$ , \*\* $p<.01$ , two-way ANOVA with Tukey post-test. Mean  $\pm$  SEM,  $n=3$  wells.

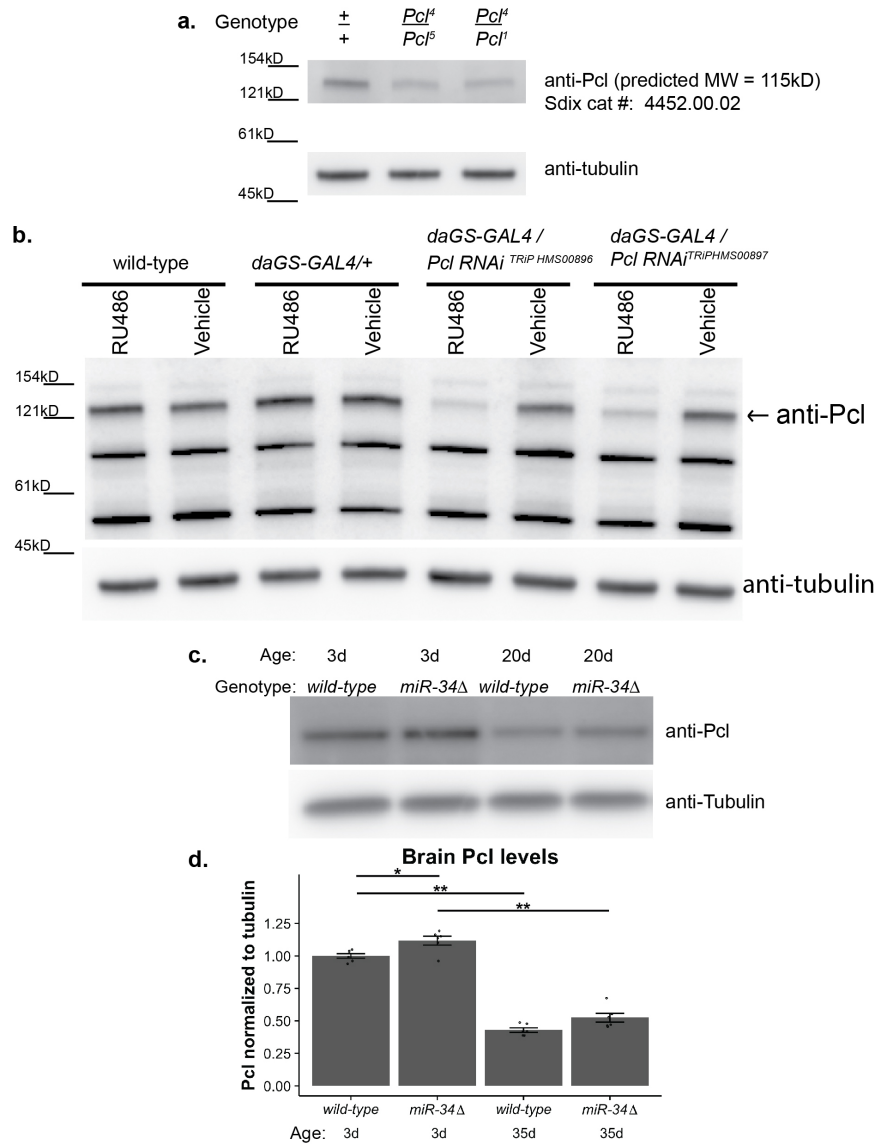

### Supplementary Figure 2: Validation of Pcl antibody and extended timepoint (Associated with Figure 2)

**a.** Confirmation of the specificity of the Pcl antibody (Sdix, Newark, DE). Three bands were detected; however, only one was decreased in animals with mutations in *Pcl*. Two genotypes were tested,  $Pcl^f/Pcl^5$  and  $Pcl^f/Pcl^l$ , and a wild-type control +/+. Adult male brains, 3d of age.

**b.** Specificity was also confirmed using knock-down of *Pcl*. Adult flies of the indicated genotypes were aged in the presence of RU486 or vehicle control upon eclosion from the pupal case. RU486 induces activity of GAL4 Geneswitch under the control of the constitutive *daughterless* promoter, inducing *UAS-Pcl RNAi*. Brains were dissected from adult males 10d of age. Tubulin, loading control.

**c.** Pcl protein levels are de-regulated in *miR-34* mutant brains (extended timepoint). Western immunoblots against Pcl (top) and Tubulin (loading control, bottom).

**d.** Quantitation of immunoblots. Pcl levels decrease with age in wild-type and in *miR-34* mutant brains. Protein samples from dissected brains. Western immunoblot, with tubulin as the loading control. Pcl protein levels normalized to tubulin. Mean ± SEM, n=6 biological replicates.

Significant main effects were observed (genotype:  $F_{1,20}=15.5$ ,  $p<0.01$  age:  $F_{1,20}=461.9$ ,  $p<0.001$ ). (\* $p<0.05$ , \*\* $p<0.01$ , two-way ANOVA with Tukey post-test).

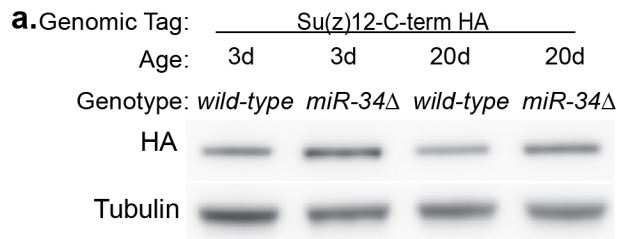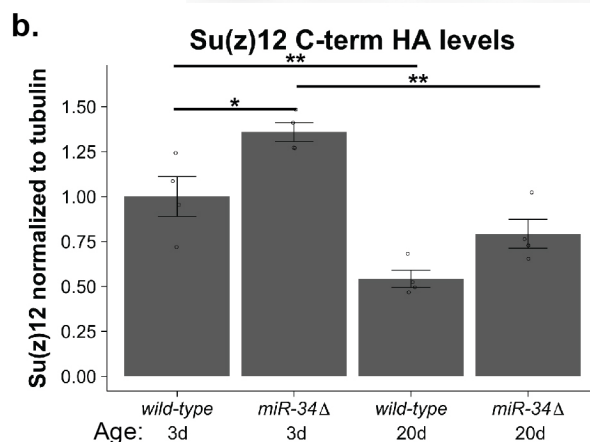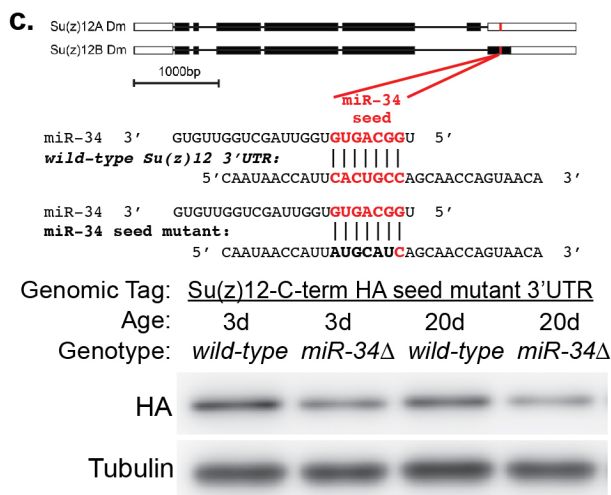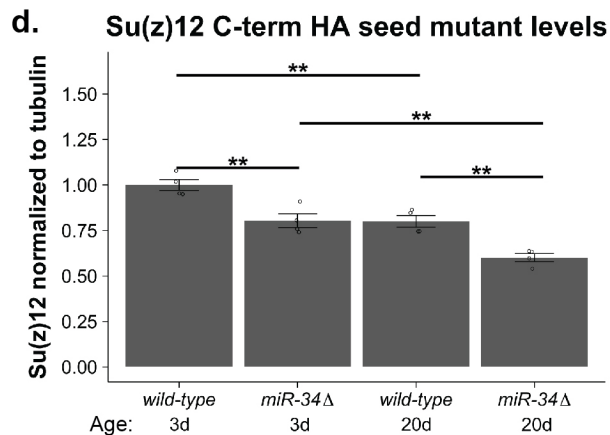

**Supplementary Figure 3: Independently integrated reporter transgenes confirm that Su(z)12 is a target of miR-34 in the brain (Associated with Figure 3)**

**a, b.** Su(z)12 protein levels are de-regulated in *miR-34* mutants. Su(z)12 protein was detected using a transgene containing the *Su(z)12* genomic region tagged with an HA epitope on the C-terminus of the predicted protein (Su(z)12-C-term HA). **a.** Western immunoblotting to detect Su(z)12 reporter levels in dissected brain. **b.** Quantification of Su(z)12 levels. Su(z)12 reporter expression decreased with age in wild-type, but is elevated in *miR-34* mutants. Protein samples from dissected brains. Su(z)12-C-term HA protein levels were normalized to tubulin loading control. Mean  $\pm$  SEM, n=4 biological repeats. Significant main effects were observed (genotype:  $F_{1,12}=15.5$ ,  $p<0.002$  age:  $F_{1,12}=43.9$ ,  $p<0.001$ ). (\* $p<0.05$ , \*\* $p<0.01$ , two-way ANOVA with Tukey post-test).

**c, d.** The regulation of Su(z)12 protein levels by *miR-34* is dependent upon the *miR-34* seed sequence in the 3'UTR of the *Su(z)12* transcript. The Su(z)12-C-term HA-mutant 3'UTR transgene contains a mutation in the *miR-34* seed sequence that relieves the transcript from regulation by *miR-34* (see Fig. 1d). **c.** The seed mutant is designed to disrupt base pairing between the Su(z)12 3'UTR of the transgene and miR-34. Su(z)12-C-term HA-mutant 3'UTR protein levels still decrease with age, but are no longer increased in *miR-34* mutants, and are in fact decreased relative to wild-type. Protein samples from dissected brains. **d.** Quantification of Su(z)12-C-term HA-mutant 3'UTR protein levels using Western immunoblotting, normalized to tubulin loading control. Mean  $\pm$  SEM, n=4 biological replicates. Significant main effects were observed (genotype:  $F_{1,12}=40.4$ ,  $p<0.001$  age:  $F_{1,12}=41.5$ ,  $p<0.001$ ). (\* $p<0.05$ , \*\* $p<0.01$  two-way ANOVA with Tukey post-test).

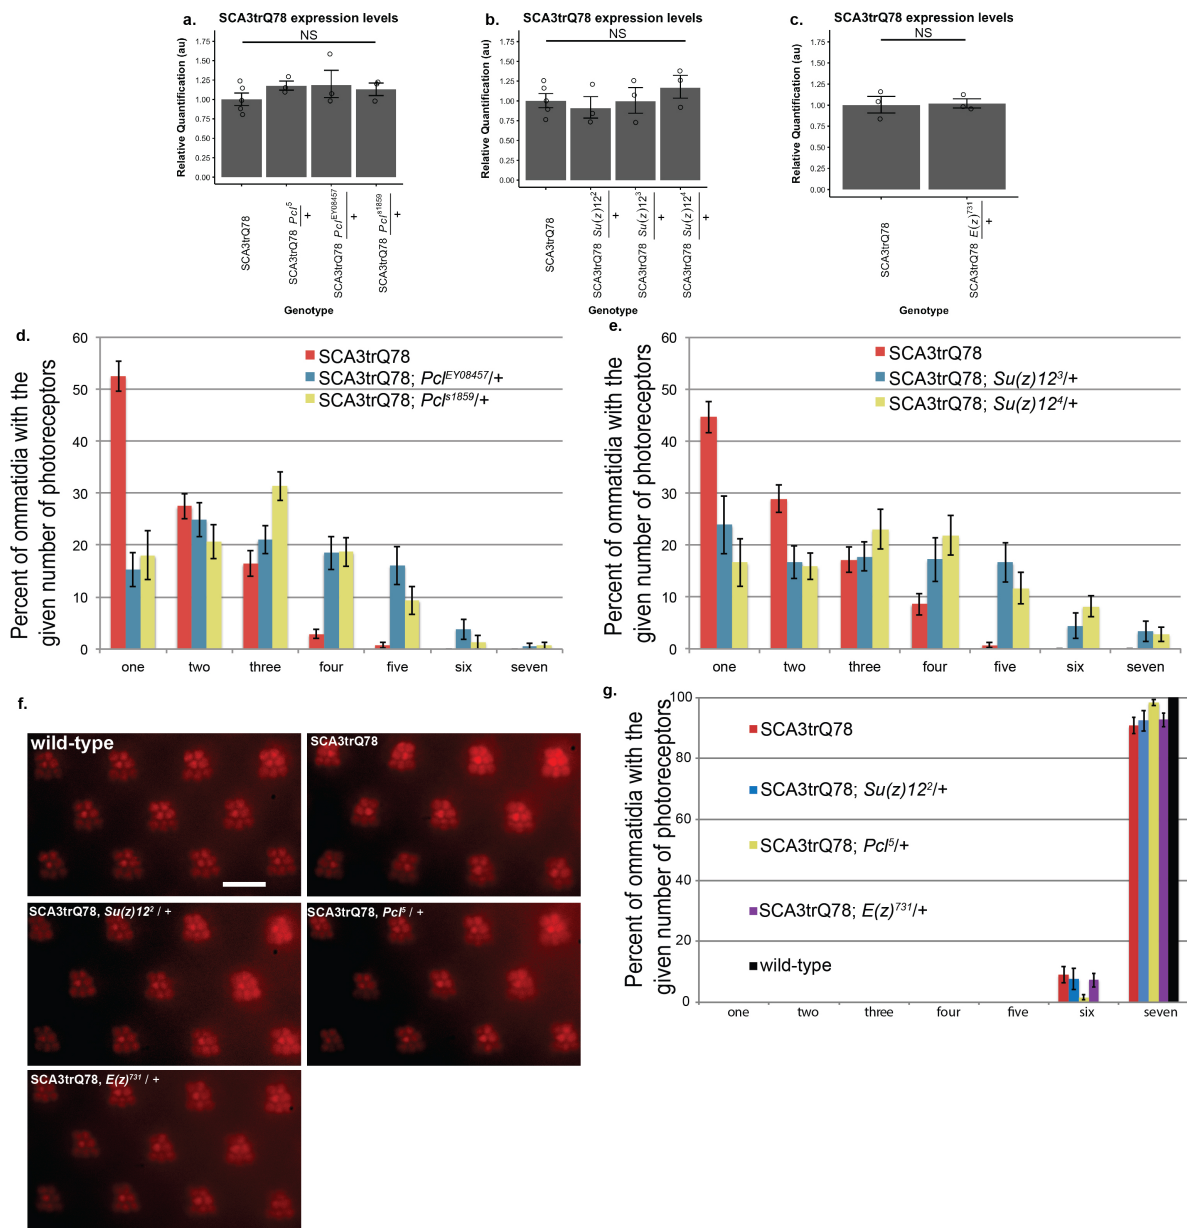

**Supplementary Figure 4: Retinal degeneration due to pathogenic ATXN3 is suppressed by heterozygous mutations in *Pcl* or *Su(z)12* (Associated with Figure 5)**

**a, b, c.** qPCR analysis demonstrating that heterozygous mutations in (a) *Pcl*, (b) *Su(z)12*, or (c) *E(z)* do not effect transcription of the SCA3trQ78 transgene. (a) *Pcl* Mean  $\pm$  SEM, n=3 biological replicates for mutant, n=5 biological replicates for control. ( $F_{3,10}=0.9$ ,  $p>0.05$ , one-way ANOVA). (b) *Su(z)12* Mean  $\pm$  SEM, n=3 biological replicates for mutant, n=5 biological replicates for control. ( $F_{3,10}=0.6$ ,  $p>0.05$ , one-way ANOVA). (c) *E(z)* Mean  $\pm$  SEM, n=3 biological replicates for mutant, and control. ( $p>0.05$ , t-test).

**d.** Histogram showing the distribution of photoreceptors (PR) per ommatidium demonstrating mitigation of SCA3trQ78 neuronal loss by the *Pcl*<sup>EY08457</sup> and *Pcl*<sup>s1859</sup> alleles. Upon SCA3trQ78 expression (red), fewer PR are visible, averaging just 1.72 $\pm$ 0.06 SEM (n=28 flies) at 21d. In *Pcl*<sup>EY08457</sup> heterozygotes (blue) degeneration is mitigated, with the average now 3.08  $\pm$  0.18 SEM (n=19). In *Pcl*<sup>s1859</sup> heterozygotes (yellow) degeneration is again mitigated, with the average now 2.87 $\pm$ .18 SEM (n=15 flies,  $p<0.001$ , Kruskal-Wallis test, Dunn post-test). Genotypes: *rh1-GAL4*, *UAS-SCA3trQ78/+*. *Pcl*<sup>EY08457/+</sup>; *rh1-GAL4*, *UAS-SCA3trQ78/+*. *Pcl*<sup>s1859/+</sup>; *rh1-GAL4*, *UAS-SCA3trQ78/+*.

**e.** Histogram showing the distribution of PR per ommatidium demonstrating mitigation of SCA3trQ78 neural loss by the *Su(z)12*<sup>3</sup> and *Su(z)12*<sup>4</sup> alleles. Upon SCA3trQ78 expression (red), fewer PR are visible, averaging just 1.92 $\pm$ .06 SEM (n=29 flies) at 21d. In *Su(z)12*<sup>3</sup> heterozygotes (blue), PR cell loss is mitigated to 3.13 $\pm$ .3 SEM (n=18 flies,  $p<0.01$ , Kruskal-Wallis test, Dunn post-test). In *Su(z)12*<sup>4</sup> heterozygotes (yellow), PR cell loss is mitigated to 3.32 $\pm$ .21 SEM (n=18 flies,  $p<0.01$ , Kruskal-Wallis test, Dunn post-test). Genotypes: SCA3trQ78 is *rh1-GAL4*, *UAS-SCA3trQ78/+*. SCA3trQ78; *Su(z)12*<sup>3/+</sup> is *rh1-GAL4*, *UAS-SCA3trQ78 / Su(z)12*<sup>3</sup>. SCA3trQ78; *Su(z)12*<sup>4/+</sup> is *rh1-GAL4*, *UAS-SCA3trQ78 / Su(z)12*<sup>4</sup>.

**f.** Young animals (3d) heterozygous for PRC2 mutations and expressing SCA3trQ78 have no significant developmental or overproliferation effects of photoreceptors. Each panel shows seven ommatidial units, with only mild photoreceptor cell loss induced by SCA3trQ78. Scale bar indicates 10 $\mu$ m.

**g.** Histogram showing the distribution of photoreceptors (PR) per ommatidium at 3d in wild-type (black, 7.0 PR), SCA3trQ78 (red, 6.91  $\pm$  0.08 SEM), SCA3trQ78; *Su(z)12*<sup>2/+</sup> (blue, 6.92  $\pm$  0.03 SEM), SCA3trQ78; *Pcl*<sup>5/+</sup> (yellow, 6.98  $\pm$  0.03 SEM), SCA3trQ78; *E(z)*<sup>731/+</sup> (purple, 6.93  $\pm$  0.07 SEM). n=10 flies for each genotype.



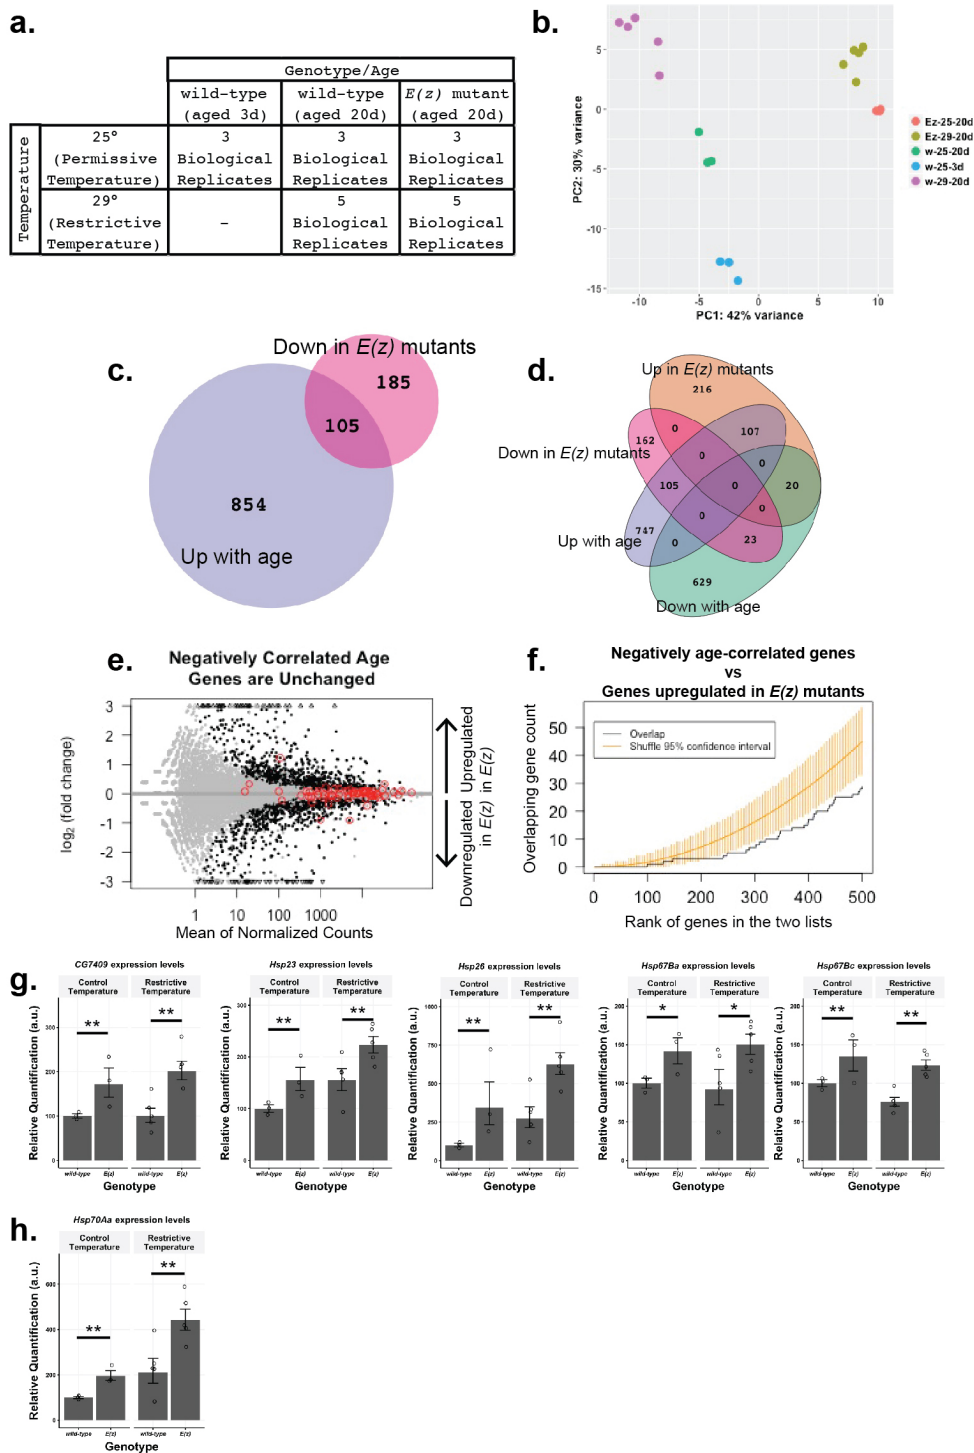

**Supplementary Figure 5: RNA-seq quality control and validation  
(Associated with Figure 7 & 8)**

**a. Design of RNA-seq experiments.** Experimental design and biological replicates. Samples profiled were designed to assess changes in gene expression due to  $E(z)$  mutation at two separate temperatures to account for a presumptive temperature-sensitive allele, and to assess changes in gene expression due at advanced age.

**b. Principal component analysis of RNA-seq samples.** Principal component analysis plot on rLog Normalized gene counts using DESeq2. Samples from similar genotype, temperature, and age cluster tightly together.

**c. Gene overlaps.** Overlap between genes downregulated with age and upregulated in  $E(z)$ .

**d. Gene overlaps between all categories of samples.** Overlap between all regulated genes among both age and genotype contrasts.

**e. Genes negatively correlated with age show no bias towards upregulation or downregulation in  $E(z)$  mutants.** Grey data points are genes not differentially expressed. Black data points are differentially expressed genes ( $p < 0.05$ ). Red circles are genes corresponding to probe sets previously defined as negatively correlated with age<sup>1</sup>. The overlap between genes called either upregulated or downregulated in  $E(z)$  mutants and the genes negatively-correlated with age is not statistically significant (hypergeometric test).

**f. Ordered list analysis of the genes negatively-correlated with age.** Two ranked lists of genes were compared: a list of genes ranked by degree of upregulation in  $E(z)$  mutants (Supplementary Data 1) and the top 500 genes ranked by negative correlation with age<sup>1</sup> (Supplementary Data 2).  $E(z)$  upregulated genes were ranked by the product of the  $-\log(p)$  value and the moderated  $\log_2$  fold-change (high to low), such that genes upregulated in  $E(z)$  mutants are at the top. All negatively age-correlated genes were ranked according to increasing  $p$  value of the correlation with age among all genes with a negative correlation, followed by genes with positive correlation which were ranked according to decreasing  $p$  value. Yellow bars indicate 95% confidence intervals. There was no statistically significant overlap.

**g. Small HSPs are upregulated in  $E(z)$  mutant brains.** Regulation of mRNA levels of *CG7409*, *Hsp23*, *Hsp26*, *Hsp67Ba*, and *Hsp67Bc* by  $E(z)$  was confirmed using qPCR on cDNA prepared from the samples used in RNA-seq. For each gene, the levels are elevated in  $E(z)$  mutant brains. Asterisks indicate significance of main effect of genotype in two-way ANOVA (\*\* $p < 0.01$ , \* $p < 0.05$ ). *CG7409*:  $F_{1,12} = 20.9$ . *Hsp23*:  $F_{1,12} = 11.9$ . *Hsp26*:  $F_{1,12} = 18.7$ . *Hsp67Ba*:  $F_{1,12} = 6.1$ . *Hsp67Bc*:  $F_{1,12} = 26.5$ .

**h. *Hsp70* is upregulated in  $E(z)$  mutant brains.** Regulation of mRNA levels of *Hsp70* by  $E(z)$  was confirmed using realtime qPCR on cDNA prepared from the samples used in RNA-seq. Asterisks indicate significance of main effect of genotype in two-way ANOVA ( $F_{1,12} = 14.8$  \*\* $p < .01$ ). This assay detects three isoforms of *Hsp70* in addition to *Hsp70Ba*, which is upregulated 10-fold in  $E(z)$  mutants in the RNA-seq data.

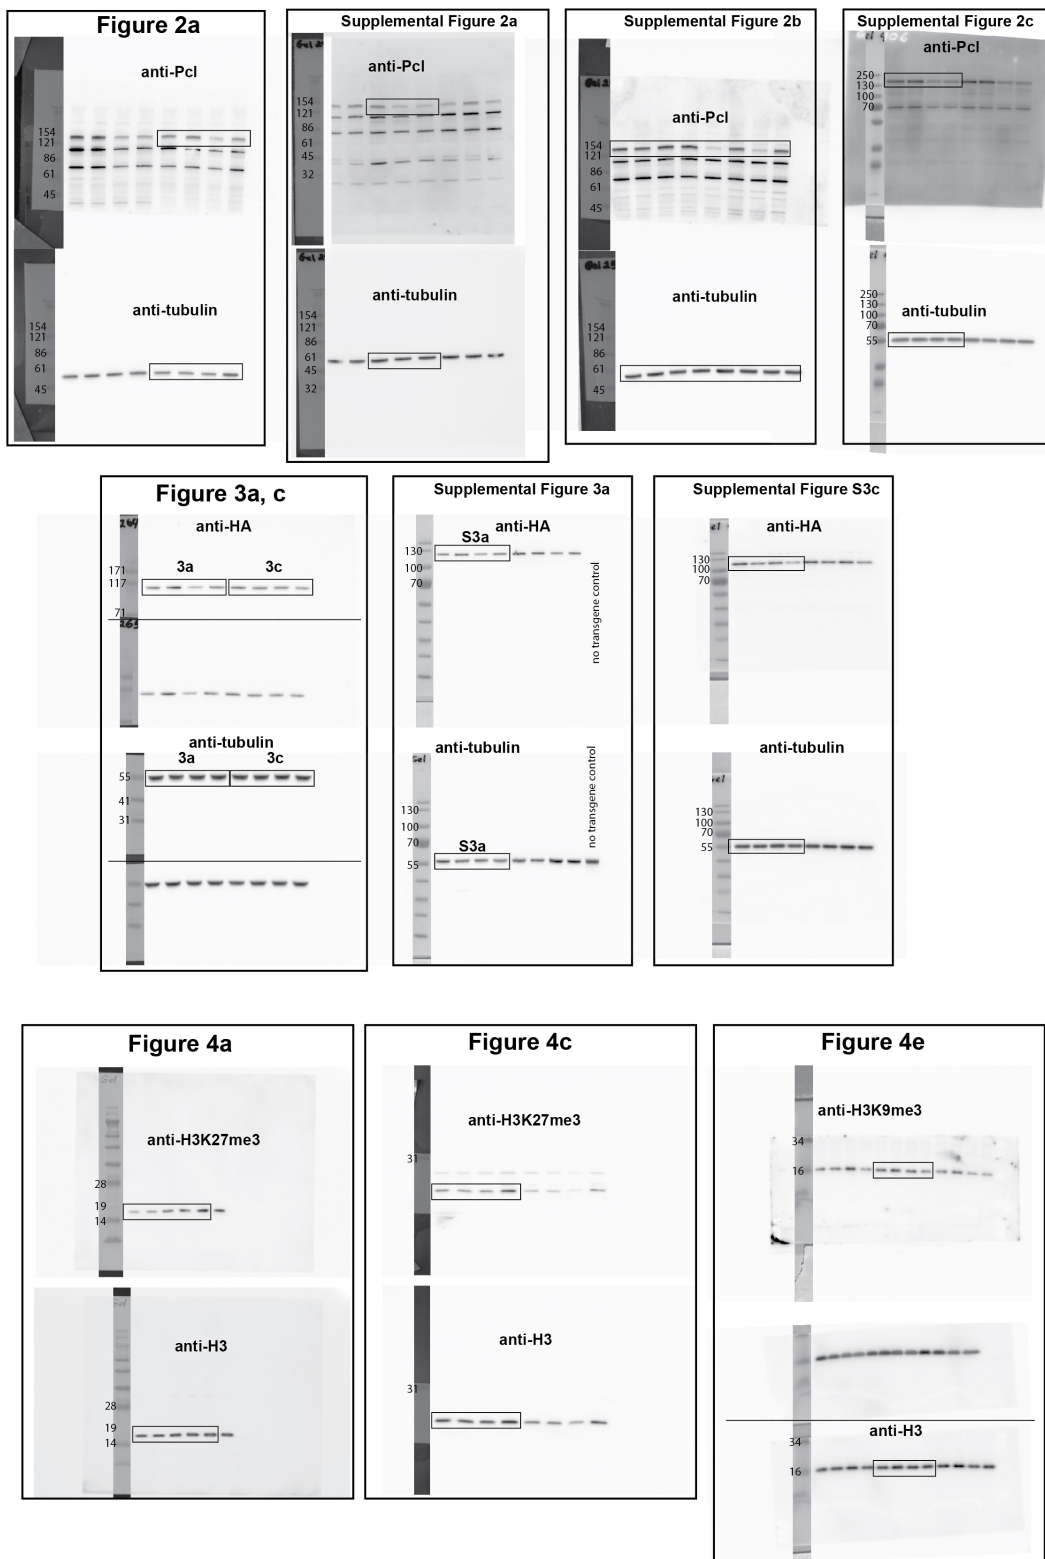

**Supplementary Figure 6: Whole Western Blots with size markers**

Uncropped Western blot images for each figure. In some cases, the image contains two blots developed simultaneously, in which case the image is bisected by a line. Bands presented in the figure are boxed.

## SUPPLEMENTARY TABLES AND LEGENDS

### Supplementary Table 1: *Pcl* and *Su(z)12* are predicted targets of *miR-34*

Tabulation of microRNA prediction results from several algorithms. Four prediction algorithms were used to assess whether *miR-34* targets *Pcl* and *Su(z)12* in *Drosophila*, *SUZ12* and *PHF19* in mouse, and *SUZ12*, *PHF19*, and *MTF2* in humans. “-” indicates that the algorithm does not predict the given gene as a target, and a “+” indicates that it does. Programs used were DIANA<sup>2</sup>; Miranda<sup>3</sup>; PicTar<sup>4</sup>; Targetscan<sup>5</sup>. No target sites were predicted using these programs in *SUZ12* or *MTF2*.

| Species                | Gene           | TargetSCAN | PicTar | miRanda | DIANA-microT |
|------------------------|----------------|------------|--------|---------|--------------|
| <i>D. melanogaster</i> | <i>Su(z)12</i> | -          | +      | +       | +            |
|                        | <i>Pcl</i>     | +          | +      | +       | +            |
| <i>M. musculus</i>     | <i>PHF19</i>   | +          | +      | -       | +            |
| <i>H. sapiens</i>      | <i>PHF19</i>   | +          | -      | -       | +            |

+ Predicted target

- Not a predicted target

### Supplementary Table 2: DAVID analysis of differentially regulated gene sets in brains of *E(z)* and in the brain with age

GO Terms, KEGG Pathways, and InterPro Motifs associated with genes called downregulated in *E(z)* mutant brains, genes upregulated with age, genes upregulated in *E(z)* mutant brains, and genes downregulated with age. The “Category” of each gene set is indicated on the left, “Term” is the name of the given gene set, “Gene Count” is the number of genes called differentially expressed in the given gene set, with the percentage indicated in parentheses. On the right is the Benjamini adjusted *p* value, a threshold for which was set at 0.1.

| <b>Genes upregulated in <i>E(z)</i> mutants</b> |                                                                                                                  |                             |                                   |
|-------------------------------------------------|------------------------------------------------------------------------------------------------------------------|-----------------------------|-----------------------------------|
| <b>Category</b>                                 | <b>Term</b>                                                                                                      | <b>Gene Count (percent)</b> | <b>Benjamini adjusted p value</b> |
| InterPro Domains                                | IPR002068:Alpha crystallin/Hsp20 domain                                                                          | 5 (1.78)                    | 2.62E-02                          |
|                                                 | IPR020846:Major facilitator superfamily domain                                                                   | 13 (4.63)                   | 3.68E-02                          |
|                                                 | IPR017972:Cytochrome P450, conserved site                                                                        | 9 (3.2)                     | 4.00E-02                          |
|                                                 | IPR001128:Cytochrome P450                                                                                        | 10 (3.56)                   | 4.18E-02                          |
|                                                 | IPR001436:Alpha crystallin/Heat shock protein                                                                    | 4 (1.42)                    | 6.14E-02                          |
|                                                 | IPR002401:Cytochrome P450, E-class, group I                                                                      | 8 (2.85)                    | 7.19E-02                          |
|                                                 | IPR008978:HSP20-like chaperone                                                                                   | 5 (1.78)                    | 7.51E-02                          |
| GO: Biological Process                          | GO:0055114~oxidation-reduction process                                                                           | 23 (8.19)                   | 6.80E-03                          |
|                                                 | GO:0055085~transmembrane transport                                                                               | 17 (6.05)                   | 3.54E-02                          |
|                                                 | GO:0046701~insecticide catabolic process                                                                         | 5 (1.78)                    | 9.87E-02                          |
| GO: Cellular Component                          | GO:0031090~organelle membrane                                                                                    | 10 (3.56)                   | 1.48E-03                          |
|                                                 | GO:0005887~integral component of plasma membrane                                                                 | 23 (8.19)                   | 4.82E-03                          |
|                                                 | GO:0005789~endoplasmic reticulum membrane                                                                        | 12 (4.27)                   | 8.96E-02                          |
| GO: Molecular Function                          | GO:0005506~iron ion binding                                                                                      | 14 (4.98)                   | 2.55E-03                          |
|                                                 | GO:0016705~oxidoreductase activity, acting on paired donors, with incorporation or reduction of molecular oxygen | 10 (3.56)                   | 8.17E-03                          |
|                                                 | GO:0004497~monooxygenase activity                                                                                | 10 (3.56)                   | 9.41E-03                          |
|                                                 | GO:0016491~oxidoreductase activity                                                                               | 14 (4.98)                   | 1.02E-02                          |
|                                                 | GO:0020037~heme binding                                                                                          | 10 (3.56)                   | 7.49E-02                          |
| KEGG Pathways                                   | dme01100:Metabolic pathways                                                                                      | 27 (9.61)                   | 5.67E-02                          |
|                                                 | dme00040:Pentose and glucuronate interconversions                                                                | 6 (2.14)                    | 6.14E-02                          |

| <b>Genes downregulated with Age</b> |                                                                                         |                                 |                                       |
|-------------------------------------|-----------------------------------------------------------------------------------------|---------------------------------|---------------------------------------|
| <b>Category</b>                     | <b>Term</b>                                                                             | <b>Gene Count<br/>(percent)</b> | <b>Benjamini<br/>adjusted p value</b> |
| InterPro<br>Domains                 | IPR005821:Ion transport domain                                                          | 10 (2.49)                       | 5.51E-03                              |
|                                     | IPR006029:Neurotransmitter-gated ion-channel transmembrane domain                       | 7 (1.75)                        | 3.93E-02                              |
|                                     | IPR006202:Neurotransmitter-gated ion-channel ligand-binding                             | 7 (1.75)                        | 4.10E-02                              |
|                                     | IPR006201:Neurotransmitter-gated ion-channel                                            | 7 (1.75)                        | 4.10E-02                              |
|                                     | IPR018000:Neurotransmitter-gated ion-channel, conserved site                            | 7 (1.75)                        | 4.37E-02                              |
|                                     | IPR001436:Alpha crystallin/Heat shock protein                                           | 5 (1.25)                        | 4.40E-02                              |
|                                     | IPR004119:Protein of unknown function DUF227                                            | 8 (2)                           | 5.15E-02                              |
|                                     | IPR015897:CHK kinase-like                                                               | 8 (2)                           | 5.15E-02                              |
|                                     | IPR027359:Voltage-dependent potassium channel, four helix bundle domain                 | 5 (1.25)                        | 7.89E-02                              |
|                                     | IPR002068:Alpha crystallin/Hsp20 domain                                                 | 5 (1.25)                        | 7.89E-02                              |
| GO: Biological<br>Process           | GO:0015992~proton transport                                                             | 11 (2.74)                       | 6.63E-06                              |
|                                     | GO:0007268~chemical synaptic transmission                                               | 16 (3.99)                       | 1.44E-05                              |
|                                     | GO:0015986~ATP synthesis coupled proton transport                                       | 8 (2)                           | 6.08E-04                              |
|                                     | GO:0006813~potassium ion transport                                                      | 8 (2)                           | 1.02E-02                              |
|                                     | GO:0007274~neuromuscular synaptic transmission                                          | 12 (2.99)                       | 1.73E-02                              |
|                                     | GO:0006811~ion transport                                                                | 9 (2.24)                        | 2.94E-02                              |
|                                     | GO:0006120~mitochondrial electron transport, NADH to ubiquinone                         | 8 (2)                           | 3.38E-02                              |
|                                     | GO:0006812~cation transport                                                             | 8 (2)                           | 3.38E-02                              |
|                                     | GO:0048790~maintenance of presynaptic active zone structure                             | 5 (1.25)                        | 3.88E-02                              |
|                                     | GO:0009612~response to mechanical stimulus                                              | 6 (1.5)                         | 4.05E-02                              |
| GO: Cellular<br>Component           | GO:0005811~lipid particle                                                               | 34 (8.48)                       | 5.07E-09                              |
|                                     | GO:0030054~cell junction                                                                | 16 (3.99)                       | 5.41E-06                              |
|                                     | GO:0005747~mitochondrial respiratory chain complex I                                    | 10 (2.49)                       | 7.64E-04                              |
|                                     | GO:0005887~integral component of plasma membrane                                        | 38 (9.48)                       | 7.67E-04                              |
|                                     | GO:0016021~integral component of membrane                                               | 119 (29.68)                     | 2.14E-03                              |
|                                     | GO:0005739~mitochondrion                                                                | 37 (9.23)                       | 2.30E-03                              |
|                                     | GO:0005743~mitochondrial inner membrane                                                 | 14 (3.49)                       | 4.01E-03                              |
|                                     | GO:0005886~plasma membrane                                                              | 47 (11.72)                      | 4.54E-03                              |
|                                     | GO:0031430~M band                                                                       | 5 (1.25)                        | 8.01E-03                              |
|                                     | GO:0045211~postsynaptic membrane                                                        | 9 (2.24)                        | 8.38E-03                              |
|                                     | GO:0000276~mitochondrial proton-transporting ATP synthase complex, coupling factor F(o) | 5 (1.25)                        | 1.05E-02                              |
|                                     | GO:0031594~neuromuscular junction                                                       | 10 (2.49)                       | 1.41E-02                              |
|                                     | GO:0000275~mitochondrial proton-transporting ATP synthase complex, catalytic core F(1)  | 4 (1)                           | 2.21E-02                              |
| GO:0016328~lateral plasma membrane  | 5 (1.25)                                                                                | 8.85E-02                        |                                       |
| GO: Molecular<br>Function           | GO:0046933~proton-transporting ATP synthase activity, rotational mechanism              | 9 (2.24)                        | 3.30E-05                              |
|                                     | GO:0008553~hydrogen-exporting ATPase activity, phosphorylative mechanism                | 5 (1.25)                        | 6.47E-02                              |
|                                     | GO:0003954~NADH dehydrogenase activity                                                  | 7 (1.75)                        | 6.81E-02                              |

|                  |                                                     |            |          |
|------------------|-----------------------------------------------------|------------|----------|
|                  | GO:0005249~voltage-gated potassium channel activity | 6 (1.5)    | 9.44E-02 |
| KEGG<br>Pathways | dme00190:Oxidative phosphorylation                  | 29 (7.23)  | 1.25E-12 |
|                  | dme01100:Metabolic pathways                         | 71 (17.71) | 1.46E-10 |
|                  | dme01230:Biosynthesis of amino acids                | 12 (2.99)  | 2.75E-04 |
|                  | dme01200:Carbon metabolism                          | 15 (3.74)  | 3.71E-04 |
|                  | dme04512:ECM-receptor interaction                   | 6 (1.5)    | 1.19E-03 |
|                  | dme00220:Arginine biosynthesis                      | 5 (1.25)   | 9.72E-03 |
|                  | dme01130:Biosynthesis of antibiotics                | 17 (4.24)  | 1.22E-02 |
|                  | dme00010:Glycolysis / Gluconeogenesis               | 8 (2)      | 1.44E-02 |
|                  | dme00020:Citrate cycle (TCA cycle)                  | 7 (1.75)   | 1.57E-02 |
|                  | dme01210:2-Oxocarboxylic acid metabolism            | 5 (1.25)   | 1.61E-02 |
|                  | dme00830:Retinol metabolism                         | 6 (1.5)    | 1.74E-02 |
|                  | dme00983:Drug metabolism - other enzymes            | 7 (1.75)   | 2.17E-02 |
|                  | dme00630:Glyoxylate and dicarboxylate metabolism    | 6 (1.5)    | 2.24E-02 |
|                  | dme00053:Ascorbate and aldarate metabolism          | 5 (1.25)   | 5.40E-02 |
|                  | dme00910:Nitrogen metabolism                        | 4 (1)      | 6.04E-02 |

### Genes Downregulated in *E(z)* Mutants

| Category                                                              | Term                                                                        | Gene Count (percent) | Benjamini adjusted <i>p</i> value |
|-----------------------------------------------------------------------|-----------------------------------------------------------------------------|----------------------|-----------------------------------|
| InterPro Domains                                                      | IPR005521:Attacin, C-terminal                                               | 5 (1.78)             | 5.91E-04                          |
|                                                                       | IPR014756:Immunoglobulin E-set                                              | 9 (3.2)              | 0.006035175                       |
|                                                                       | IPR015510:Peptidoglycan recognition protein                                 | 5 (1.78)             | 0.006938317                       |
|                                                                       | IPR002502:N-acetylmuramoyl-L-alanine amidase domain                         | 5 (1.78)             | 0.007496597                       |
|                                                                       | IPR006619:Peptidoglycan recognition protein family domain, metazoa/bacteria | 5 (1.78)             | 0.007496597                       |
|                                                                       | IPR017331:Peptidoglycan recognition protein, PGRP-S                         | 4 (1.42)             | 0.008190656                       |
|                                                                       | IPR005520:Attacin, N-terminal                                               | 4 (1.42)             | 0.009995804                       |
| GO: Biological Process                                                | GO:0019731~antibacterial humoral response                                   | 9 (3.2)              | 1.30E-06                          |
|                                                                       | GO:0050830~defense response to Gram-positive bacterium                      | 11 (3.91)            | 5.47E-06                          |
|                                                                       | GO:0007601~visual perception                                                | 12 (4.27)            | 6.64E-06                          |
|                                                                       | GO:0045087~innate immune response                                           | 14 (4.98)            | 8.45E-06                          |
|                                                                       | GO:0009617~response to bacterium                                            | 8 (2.85)             | 6.53E-04                          |
|                                                                       | GO:0009253~peptidoglycan catabolic process                                  | 5 (1.78)             | 0.009387639                       |
|                                                                       | GO:0007602~phototransduction                                                | 8 (2.85)             | 0.012389477                       |
|                                                                       | GO:0016059~deactivation of rhodopsin mediated signaling                     | 5 (1.78)             | 0.0182863                         |
|                                                                       | GO:0006959~humoral immune response                                          | 5 (1.78)             | 0.021244987                       |
|                                                                       | GO:0042742~defense response to bacterium                                    | 7 (2.49)             | 0.033155188                       |
| GO:0050962~detection of light stimulus involved in sensory perception | 3 (1.07)                                                                    | 0.063836943          |                                   |
| GO: Cellular Component                                                | GO:0016028~rhabdomere                                                       | 12 (4.27)            | 9.60E-09                          |
|                                                                       | GO:0005576~extracellular region                                             | 23 (8.19)            | 0.001892863                       |
|                                                                       | GO:0016027~inaD signaling complex                                           | 5 (1.78)             | 0.00278399                        |
|                                                                       | GO:0005615~extracellular space                                              | 20 (7.12)            | 0.030827809                       |
| GO: Molecular Function                                                | GO:0008745~N-acetylmuramoyl-L-alanine amidase activity                      | 5 (1.78)             | 0.013519092                       |
|                                                                       | GO:0042834~peptidoglycan binding                                            | 5 (1.78)             | 0.025970077                       |
| KEGG Pathways:                                                        | dme04745:Phototransduction - fly                                            | 6 (2.14)             | 0.001074313                       |

### Genes Upregulated with Age

| Category               | Term                                     | Gene Count (percent) | Benjamini adjusted <i>p</i> value |
|------------------------|------------------------------------------|----------------------|-----------------------------------|
| GO: Biological Process | GO:0007052~mitotic spindle organization  | 11 (2.17)            | 0.077527726                       |
| GO: Cellular Component | GO:0005576~extracellular region          | 35 (6.90)            | 4.09E-05                          |
|                        | GO:0005615~extracellular space           | 32 (6.31)            | 0.001354075                       |
|                        | GO:0000776~kinetochore                   | 9 (1.78)             | 0.016590776                       |
|                        | GO:0032133~chromosome passenger complex  | 4 (0.79)             | 0.020331765                       |
|                        | GO:0051233~spindle midzone               | 5 (0.99)             | 0.069461209                       |
| GO: Molecular Function | GO:0005184~neuropeptide hormone activity | 12 (2.37)            | 3.52E-05                          |



**Supplementary Table 3: qPCR amplicons**

qPCR amplicons listing the target of interest and sequences of the two primers used. Also indicated is the correlation coefficient ( $R^2$ ) and Efficiency.

| Target    | Left primer sequence     | Right primer sequence    | $R^2$ | Efficiency (%) |
|-----------|--------------------------|--------------------------|-------|----------------|
| SCA3trQ78 | CAGGACAGAGTTCACATCCATGT  | GCCTTACCTAGATCACTCCCAAGT | 0.999 | 104.4          |
| tbp       | TAAGCCCCAACTTCTCGATTCC   | GCCAAAGAGACCTGATCCCC     | 0.996 | 108.3          |
| RpS20     | CCGCATCACCTGACATCC       | TGGTGATGCGAAGGGTCTTG     | 0.999 | 95.6           |
| pgk       | ATCACCAGCAACCAGAGAATTG   | TGCCAGGGTGTACTTGATGTT    | 0.990 | 103.8          |
| HSP23     | TGAGGAGCGCGAAGATGAC      | CATAGCGGCGGACAAAGTG      | 0.995 | 99.5           |
| HSP67Ba   | GTTTCTTGTGTTTTCTTTCTTGCA | GTGCTTTTCCCGTCAGCTTT     | 0.997 | 97.2           |
| HSP67Bc   | CGGCAGCATCATGATCTTGA     | CACCCATCCGGGCAATC        | 0.999 | 101.5          |
| HSP67Bc   | CCACCCGCTGGCAAATC        | CGACGACCTGTTTTCTTTCA     | 0.999 | 97.2           |
| CG13133   | AGCGCGAGATCGAGATTGA      | TCGGACACGCTGCCAAA        | 0.982 | 104.9          |

**Supplementary Table 4: Genotyping primers**

Genotyping primers indicates primers used to genotype the  $E(z)^{61}$  and  $E(z)^{731}$  alleles in a heterozygous background. Column "Allele" indicates the allele being genotyped. Column "L Primer" and "R Primer" indicate the sequence of the primers used in PCR. Column "enzyme" indicates the restriction endonuclease used to resolve the different alleles. Column "+/+ (bp)" indicates the restriction fragment size expected for wild-type DNA amplified with the given primers and digested with the given enzyme. Column "+/- (bp)" indicates the sized expected if the DNA amplified was from a heterozygous animal.

| Allele       | L Primer                 | R Primer                 | enzyme      | +/+ (bp)   | +/- (bp)           |
|--------------|--------------------------|--------------------------|-------------|------------|--------------------|
| $E(z)^{61}$  | TGCAATACGAAGCAGTGTCTTGC  | CATGAGCAGGTGCTTGTCTGCAAT | <i>Acil</i> | 148,<br>70 | 218,<br>148,<br>70 |
| $E(z)^{731}$ | AGCGAGGACTGCGTAAGAAACCTT | GGCAAACCGAATCTTGTTGCCCTT | <i>Ddel</i> | 310        | 190,<br>120        |

**Supplementary Table 5: Plasmid details**

Description of construct and primer sequences of cloning methods used to create plasmids used in this work.

| Plasmid        | Text name                          | Description                                                                                                                                                   | Left Primer Sequence                                                                                                                                                    | Right Primer Sequence                                                                                                                                    |
|----------------|------------------------------------|---------------------------------------------------------------------------------------------------------------------------------------------------------------|-------------------------------------------------------------------------------------------------------------------------------------------------------------------------|----------------------------------------------------------------------------------------------------------------------------------------------------------|
| <b>pJRK200</b> | pMT-Renilla Pcl 3'UTR              | Renilla Luciferase reporter for Pcl                                                                                                                           | CATAggatccACCCTTTGGCATACCGACT<br>CATTATGAATTTTATATTCTTCATTTCC<br>ATTATCATTCTTTTCGTTATTATGTATT<br>AATGAACGCTGCCAACTACGGGCCTC<br>TTTATTTGTTAATGTTTAAAAGTTTATTA<br>CCAACCC | AGGTgtcgacTTTTACAATTTAACATTT<br>TATCGCTTAAATGCTGAACCAATATTT<br>TGAACAACTTTTTCTATTTtggCAgtgG<br>GT TGG TAA TAA ACT TTT AAA CAT<br>TAA CAA ATA AAG AGG CCC |
| <b>pJRK202</b> | pMT-Renilla Su(z)12 3'UTR          | Renilla Luciferase reporter for Su(z)12                                                                                                                       | CATAggatccATC AGT AAT AAT ACA<br>GTG CTT AAC AAG CGG CAG                                                                                                                | AGGTgtcgacGTATGTAGTCGTAGGCTC<br>TAGTGATAGTGTTCTTGC                                                                                                       |
| <b>pJRK204</b> | pMT-Renilla Pcl 3'UTR sm           | Renilla Luciferase reporter for Pcl with seed mutation induced by Quikchange---<br>Quikchange primers listed                                                  | gggcctcttattgttaagtgttaaagttattaccaacat<br>gcatcaaaatagaaaagattgtcaaatattggttca<br>gcattaa                                                                              | ttaatgctgaaccaatatttgaacaatcttttctatttggat<br>gcatggttggaataaacctttaaacattaacaaataaa<br>gaggccc                                                          |
| <b>pJRK205</b> | pMT-Renilla Su(z)12 3'UTR sm       | Renilla Luciferase reporter for Su(z)12 with seed mutation induced by Quikchange---<br>Quikchange primers listed                                              | gcgagccaaccgcaacaaaagcaataaccattatgc<br>atcagcaaccagtaacaacgc                                                                                                           | gcggttactggttctgatgcataatggttattgctttgt<br>tgcggttggctcgcg                                                                                               |
| <b>pJRK228</b> | Su(z)12 -C-term- HA                | Promoter and coding fragment fused to HA (BamHI sited downstream of stop) cloned into pCasper4 vector containing wild-type Su(z)12 3'UTR derived from pJRK202 | ttga ggtacc<br>AGCCCATCGTTTGATTGCGTTCAG                                                                                                                                 | accagtggatccTTAAGCGTAATCTGGAAC<br>ATCGTATGGGTA<br>GTTGCCACACAGTTGTTGGC AAC                                                                               |
| <b>pJRK235</b> | Su(z)12 -C-term- HA- mutant- 3'UTR | Promoter and coding fragment fused to HA (BamHI sited downstream of stop) cloned into pCasper4 vector containing mutated Su(z)12 3'UTR derived from pJRK205   | ttga ggtacc<br>AGCCCATCGTTTGATTGCGTTCAG                                                                                                                                 | accagtggatccTTAAGCGTAATCTGGAAC<br>ATCGTATGGGTA<br>GTTGCCACACAGTTGTTGGC AAC                                                                               |

### Supplementary Table 6: Antibodies & Western parameters

Antibodies and experimental parameters used in western immunoblotting. Pcl and Histones are high pI proteins that required a higher pH transfer buffer. The first few columns list the target, catalog number, Lot, and manufacturer of each antibody used. Column “Pre-Blocking” indicates the blocking buffer used. Column “Gel type” indicates the various gels used for each antigen. Column “Transfer Type / Buffer” indicates the methods used to transfer the proteins to PVDF membrane. Column “Transfer time & temperature” indicates transfer conditions. Column “1° dilution” indicates the concentration of primary antibody used relative to the manufacturer supplied stock. Column “primary antibody buffer” indicates the buffer used in primary antibody incubations. Columns “2° catalog number”, “2° antibody dilution”, and “2° antibody buffer” indicate the parameters used for secondary antibody incubation. After each antibody incubation, the immunoblots were rinsed as indicated in Column “Post-incubation Rinses”

|                                  | HA                               | tubulin                            | Pcl                               | antigen                     |
|----------------------------------|----------------------------------|------------------------------------|-----------------------------------|-----------------------------|
| <b>H3K27me3 (Fig 3C,D)</b>       |                                  |                                    |                                   |                             |
| 07-449                           | 1.2014E+10                       | #9099S                             | 44520002                          | 1° catalog number           |
| DAM1662421                       | 11058700                         | 1                                  | G3131-055A01                      | Lot                         |
| Millipore                        | Roche                            | Cell Signalling                    | Novus                             | 1° manufacturer             |
| 1hr in TBS + 5% non-fat dry milk | 1hr in PBS + 5% non-fat dry milk | 1hr in TBS + 5% non-fat dry milk   | 1hr in TBST + 5% non-fat dry milk | Pre-Blocking Buffer         |
| Tris-Tricine                     | NuPage Bis-Tris (Invitrogen)     | Various (used for loading control) | Laemmli or TGX (Biorad)           | Gel type                    |
| Wet / Dunn Carbonate             | Semi-Dry / NuPage Transfer       | Various (used for loading control) | Wet / Dunn Carbonate              | Transfer Type / Buffer      |
| 16-18hr at 4 degrees             | 20m at room temperature          | Various (used for loading control) | 16-18hr at 4 degrees              | Transfer time & temperature |
| 1:30000                          | 1:500                            | 1:1000                             | 1:5000                            | 1° dilution                 |
| TBS                              | PBS + 5% non-fat dry milk        | TBS + 5% non-fat dry milk          | TBST + 5% non-fat dry milk        | primary antibody buffer     |
| 111-035-144                      | not applicable                   | not applicable                     | 111-035-144                       | 2° catalog number           |
| Jackson ImmunoResearch           | not applicable                   | not applicable                     | Jackson ImmunoResearch            | 2° antibody manufacturer    |
| 1:5000                           | not applicable                   | not applicable                     | 1:5000                            | 2° antibody dilution        |
| TBS + 5% non-fat dry milk        | not applicable                   | not applicable                     | TBS + 5% non-fat dry milk         | 2° antibody buffer          |
| 3 times for 5m in TBST           | 3 times for 5m in TBST           | 3 times for 5m in TBST             | 3 times for 5m in TBST            | Post-incubation Rinses      |

|                                  |                                   |                                  |                                   |                                        |
|----------------------------------|-----------------------------------|----------------------------------|-----------------------------------|----------------------------------------|
| <b>H3 (Figure 3C,D,E,F)</b>      | <b>H3 (Figure 3A,B)</b>           | <b>H3K9me3</b>                   | <b>H3K27me3 (Fig 3A,B)</b>        | <b>antigen</b>                         |
| #3638S                           | ab1791                            | ab8898                           | 07-449                            | 1° catalog number                      |
| 1                                | 852719                            | GR22415-2                        | DAM1662421                        | <b>Lot</b>                             |
| Cell Signalling                  | abcam                             | abcam                            | Millipore                         | 1° manufacturer                        |
| 1hr in TBS + 5% non-fat dry milk | 1hr in TBS + 5% non-fat dry milk  | 1hr in TBS + 5% non-fat dry milk | 1hr in TBS + 5% non-fat dry milk  | <b>Pre-Blocking Buffer</b>             |
| Tris-Tricine                     | NuPage Bis-Tris (Invitrogen)      | Tris-Tricine                     | NuPage Bis-Tris (Invitrogen)      | <b>Gel type</b>                        |
| Wet / Dunn Carbonate             | Semi-Dry / NuPage Transfer buffer | Wet / Dunn Carbonate             | Semi-Dry / NuPage Transfer buffer | <b>Transfer Type / Buffer</b>          |
| 16-18hr at 4 degrees             | 20m at room temperature           | 16-18hr at 4 degrees             | 20m at room temperature           | <b>Transfer time &amp; temperature</b> |
| 1:30000                          | 1:5000                            | 1:10000                          | 1:5000                            | <b>1° dilution</b>                     |
| TBS + 5% non-fat dry milk        | TBS                               | TBS                              | TBS                               | <b>primary antibody buffer</b>         |
| 115-035-146                      | 111-035-144                       | 111-035-144                      | 111-035-144                       | <b>2° catalog number</b>               |
| Jackson ImmunoResearch           | Jackson ImmunoResearch            | Jackson ImmunoResearch           | Jackson ImmunoResearch            | <b>2° antibody manufacturer</b>        |
| 1:5000                           | 1:10000                           | 1:10000                          | 1:5000                            | <b>2° antibody dilution</b>            |
| TBS + 5% non-fat dry milk        | TBS + 5% non-fat dry milk         | TBS + 5% non-fat dry milk        | TBS + 5% non-fat dry milk         | <b>2° antibody buffer</b>              |
| 3 times for 5m in TBST           | 3 times for 5m in TBST            | 3 times for 5m in TBST           | 3 times for 5m in TBST            | <b>Post-incubation Rinses</b>          |

### Supplementary Table 7: Genotypes of flies used in each experiment

Detailed genotypes of animals used in the various figures are given.

| Fig. | Text Description                                   | genotype                                                                                                                                                                                          | Stock name  | male parent stock                                                                                                                                                                                            | female parent stock                                                                                           | Reference                                          |
|------|----------------------------------------------------|---------------------------------------------------------------------------------------------------------------------------------------------------------------------------------------------------|-------------|--------------------------------------------------------------------------------------------------------------------------------------------------------------------------------------------------------------|---------------------------------------------------------------------------------------------------------------|----------------------------------------------------|
| 2    | miR-34Δ                                            | <i>Df(3R)<sup>0110</sup>, P{w<sup>+mC</sup> Fmr1<sup>tt</sup> miR-277<sup>tt</sup> =FAFB}4</i>                                                                                                    | Bonini 0110 |                                                                                                                                                                                                              |                                                                                                               | 1                                                  |
| 2    | wild-type                                          | <i>w<sup>1118</sup></i>                                                                                                                                                                           | FBst0005905 |                                                                                                                                                                                                              |                                                                                                               |                                                    |
| 3    | wild-type<br><i>Su(z)12-C-term HA</i>              | <i>w<sup>1118</sup>; P{w<sup>+mC</sup> Su(z)12<sup>+228T:lvirHA</sup> = Su(z)12 C-termHA}L5 / +</i>                                                                                               |             | JKC0744 <i>w<sup>1118</sup>; P{w<sup>+mC</sup> Su(z)12<sup>+228T:lvirHA</sup> = Su(z)12 C-termHA}L5 / SM6A</i>                                                                                               | FBst0005905                                                                                                   |                                                    |
| 3    | miR-34Δ<br><i>Su(z)12-C-term HA</i>                | <i>w<sup>1118</sup>; P{w<sup>+mC</sup> Su(z)12<sup>+228T:lvirHA</sup> = Su(z)12 C-termHA}L5 / +; Df(3R)<sup>0110</sup>, P{w<sup>+mC</sup> Fmr1<sup>tt</sup> miR-277<sup>tt</sup> =FAFB}4</i>      |             | JKC0815 <i>w<sup>1118</sup>; P{w<sup>+mC</sup> Su(z)12<sup>+228T:lvirHA</sup> = Su(z)12 C-termHA}L5 / SM6A; Df(3R)<sup>0110</sup>, P{w<sup>+mC</sup> Fmr1<sup>tt</sup> miR-277<sup>tt</sup> =FAFB}4</i>      | Bonini 0110<br><i>Df(3R)<sup>0110</sup>, P{w<sup>+mC</sup> Fmr1<sup>tt</sup> miR-277<sup>tt</sup> =FAFB}4</i> |                                                    |
| 3    | wild-type<br><i>Su(z)12-C-term HA-mutant 3'UTR</i> | <i>w<sup>1118</sup>; P{w<sup>+mC</sup> Su(z)12<sup>+235T:lvirHA</sup> = Su(z)12 C-termHA Nsil}L3 / +</i>                                                                                          |             | JKC0739 <i>w<sup>1118</sup>; P{w<sup>+mC</sup> Su(z)12<sup>+235T:lvirHA</sup> = Su(z)12 C-termHA Nsil}L3 / SM6A</i>                                                                                          | FBst0005905                                                                                                   |                                                    |
| 3    | miR-34Δ<br><i>Su(z)12-C-term HA-mutant 3'UTR</i>   | <i>w<sup>1118</sup>; P{w<sup>+mC</sup> Su(z)12<sup>+235T:lvirHA</sup> = Su(z)12 C-termHA Nsil}L3 / +; Df(3R)<sup>0110</sup>, P{w<sup>+mC</sup> Fmr1<sup>tt</sup> miR-277<sup>tt</sup> =FAFB}4</i> |             | JKC0816 <i>w<sup>1118</sup>; P{w<sup>+mC</sup> Su(z)12<sup>+235T:lvirHA</sup> = Su(z)12 C-termHA Nsil}L3 / SM6A; Df(3R)<sup>0110</sup>, P{w<sup>+mC</sup> Fmr1<sup>tt</sup> miR-277<sup>tt</sup> =FAFB}4</i> | Bonini 0110<br><i>Df(3R)<sup>0110</sup>, P{w<sup>+mC</sup> Fmr1<sup>tt</sup> miR-277<sup>tt</sup> =FAFB}4</i> |                                                    |
| 4    | miR-34Δ                                            | <i>Df(3R)<sup>0110</sup>, P{w<sup>+mC</sup> Fmr1<sup>tt</sup> miR-277<sup>tt</sup> =FAFB}4</i>                                                                                                    | Bonini 0110 |                                                                                                                                                                                                              |                                                                                                               | 1                                                  |
| 4    | wild-type                                          | <i>w<sup>1118</sup></i>                                                                                                                                                                           | FBst0005905 |                                                                                                                                                                                                              |                                                                                                               |                                                    |
| 5, 6 | wild-type                                          | Canton S                                                                                                                                                                                          | FBst0064349 |                                                                                                                                                                                                              |                                                                                                               |                                                    |
| 5, 6 | SCA3trQ78                                          | <i>rh1-gal4-1, P{w<sup>+mC</sup> UAS-Hsap\MJD.tr-Q78}c211.2 / +</i>                                                                                                                               |             | FBst0005905                                                                                                                                                                                                  | <i>rh1-gal4-1, P{w<sup>+mC</sup> UAS-Hsap\MJD.tr-Q78}c211.2 / TM6B, Tb</i>                                    |                                                    |
| 5, 6 | SCA3trQ78<br><i>Pcl<sup>5</sup> / +</i>            | <i>Pcl[5], P{neoFRT}42D / +; rh1-gal4-1, P{w<sup>+mC</sup> UAS-Hsap\MJD.tr-Q78}c211.2 / +</i>                                                                                                     |             | FBst0024157                                                                                                                                                                                                  | <i>rh1-gal4-1, P{w<sup>+mC</sup> UAS-Hsap\MJD.tr-Q78}c211.2 / TM6B, Tb</i>                                    |                                                    |
| 5, 6 | SCA3trQ78<br><i>Su(z)12<sup>2</sup> / +</i>        | <i>rh1-gal4-1, P{w<sup>+mC</sup> UAS-Hsap\MJD.tr-Q78}c211.2 / Su(z)12<sup>2</sup>, P{FRT(w<sup>hs</sup>)}2A</i>                                                                                   |             | FBst0024159                                                                                                                                                                                                  | <i>rh1-gal4-1, P{w<sup>+mC</sup> UAS-Hsap\MJD.tr-Q78}c211.2 / TM6B, Tb</i>                                    |                                                    |
| 5    | SCA3trQ78<br><i>E(z)<sup>731</sup> / +</i>         | <i>rh1-gal4-1, P{w<sup>+mC</sup> UAS-Hsap\MJD.tr-Q78}c211.2 / E(z)<sup>731</sup></i>                                                                                                              |             | JKC0226 <i>w<sup>1118</sup>; E(z)<sup>731</sup> / TM6, Sb</i>                                                                                                                                                | <i>rh1-gal4-1, P{w<sup>+mC</sup> UAS-Hsap\MJD.tr-Q78}c211.2 / TM6B, Tb</i>                                    |                                                    |
| 7    | wild-type                                          | <i>w<sup>1118</sup></i>                                                                                                                                                                           | FBst0005905 |                                                                                                                                                                                                              |                                                                                                               |                                                    |
| 7    | <i>E(z)</i>                                        | <i>w<sup>1118</sup>; E(z)<sup>731</sup> / E(z)<sup>61</sup></i>                                                                                                                                   |             | JKC0226 <i>w<sup>1118</sup>; E(z)<sup>731</sup> / TM6, Sb</i>                                                                                                                                                | JKC0200 <i>w<sup>1118</sup>; E(z)<sup>61</sup> / TM6, Sb</i>                                                  |                                                    |
| S2a  | + / +                                              | <i>w<sup>1118</sup></i>                                                                                                                                                                           | FBst0005905 |                                                                                                                                                                                                              |                                                                                                               |                                                    |
| S2a  | <i>Pcl<sup>4</sup> / Pcl<sup>5</sup></i>           | <i>Pcl<sup>4</sup> / Pcl<sup>5</sup>, P{neoFRT}42D</i>                                                                                                                                            |             | <i>Pcl<sup>4</sup> / CyO</i>                                                                                                                                                                                 | FBst0024157                                                                                                   | <i>Pcl<sup>4</sup> / CyO</i><br>gift of Ian Duncan |
| S2a  | <i>Pcl<sup>4</sup> / Pcl<sup>1</sup></i>           | <i>Pcl<sup>4</sup> / Pcl<sup>1</sup></i>                                                                                                                                                          |             | <i>Pcl<sup>1</sup> / CyO</i>                                                                                                                                                                                 | <i>Pcl<sup>4</sup> / CyO</i>                                                                                  | <i>Pcl<sup>1</sup> / CyO</i><br>gift of Ian Duncan |
| S2b  | wild-type                                          | <i>w<sup>1118</sup></i>                                                                                                                                                                           | FBst0005905 |                                                                                                                                                                                                              |                                                                                                               |                                                    |
| S2b  | daGS-GAL4/+                                        | <i>da-GeneSwitch (II) / +</i>                                                                                                                                                                     |             | FBst0005905                                                                                                                                                                                                  | <i>da-GeneSwitch (II)</i>                                                                                     | daGS-GAL4 gift of Veronica Monnier                 |

|               |                                               |                                                                                                                                                                                                     |             |                                                                                                                                                                                                                        |                                                                                                          |   |
|---------------|-----------------------------------------------|-----------------------------------------------------------------------------------------------------------------------------------------------------------------------------------------------------|-------------|------------------------------------------------------------------------------------------------------------------------------------------------------------------------------------------------------------------------|----------------------------------------------------------------------------------------------------------|---|
| <b>S2b</b>    | daGS-GAL4 / Pcl RNAi <sup>TRIP</sup> HMS00896 | da-GeneSwitch (II) / + ; P{TRIP.HMS00896}attP2 / +                                                                                                                                                  |             | FBst0033945                                                                                                                                                                                                            | da-GeneSwitch (II)                                                                                       |   |
| <b>S2b</b>    | daGS-GAL4 / Pcl RNAi <sup>TRIP</sup> HMS00897 | da-GeneSwitch (II) / + ; P{TRIP.HMS00897}attP2 / +                                                                                                                                                  |             | FBst0033946                                                                                                                                                                                                            | da-GeneSwitch (II)                                                                                       |   |
| <b>S2c, d</b> | miR-34Δ                                       | Df(3R) <sup>0110</sup> , P{w <sup>+mC</sup> Fmr1 <sup>1t</sup> miR-277 <sup>1t</sup> =FAFB}4                                                                                                        | Bonini 0110 |                                                                                                                                                                                                                        |                                                                                                          | 1 |
| <b>S2c, d</b> | wild-type                                     | w <sup>1118</sup>                                                                                                                                                                                   | FBst0005905 |                                                                                                                                                                                                                        |                                                                                                          |   |
| <b>S3</b>     | SCA3trQ78                                     | rh1-gal4-1, P{w <sup>+mC</sup> UAS-Hsap\MJD.tr-Q78}c211.2 / +                                                                                                                                       |             | FBst0005905                                                                                                                                                                                                            | rh1-gal4-1, P{w <sup>+mC</sup> UAS-Hsap\MJD.tr-Q78}c211.2 / TM6B, Tb                                     |   |
| <b>S3</b>     | SCA3trQ78 Pcl <sup>5</sup> / +                | Pcl <sup>5</sup> , P{neoFRT}42D / +; rh1-gal4-1, P{w <sup>+mC</sup> UAS-Hsap\MJD.tr-Q78}c211.2 / +                                                                                                  |             | FBst0024157                                                                                                                                                                                                            | rh1-gal4-1, P{w <sup>+mC</sup> UAS-Hsap\MJD.tr-Q78}c211.2 / TM6B, Tb                                     |   |
| <b>S3</b>     | SCA3trQ78 Pcl <sup>EY08457</sup> / +          | P{EPgy2}Pcl <sup>EY08457</sup> / +; rh1-gal4-1, P{w <sup>+mC</sup> UAS-Hsap\MJD.tr-Q78}c211.2 / +                                                                                                   |             | FBst0019876                                                                                                                                                                                                            | rh1-gal4-1, P{w <sup>+mC</sup> UAS-Hsap\MJD.tr-Q78}c211.2 / TM6B, Tb                                     |   |
| <b>S3</b>     | SCA3trQ78 Pcl <sup>1859</sup> / +             | P{lacW}Pcl <sup>1859</sup> / +; rh1-gal4-1, P{w <sup>+mC</sup> UAS-Hsap\MJD.tr-Q78}c211.2 / +                                                                                                       |             | FBst0012058                                                                                                                                                                                                            | rh1-gal4-1, P{w <sup>+mC</sup> UAS-Hsap\MJD.tr-Q78}c211.2 / TM6B, Tb                                     |   |
| <b>S3</b>     | SCA3trQ78 Su(z)12 <sup>2</sup> / +            | rh1-gal4-1, P{w <sup>+mC</sup> UAS-Hsap\MJD.tr-Q78}c211.2 / Su(z)12 <sup>2</sup> , P{FRT(w <sup>hs</sup> )}2A                                                                                       |             | FBst0024159                                                                                                                                                                                                            | rh1-gal4-1, P{w <sup>+mC</sup> UAS-Hsap\MJD.tr-Q78}c211.2 / TM6B, Tb                                     |   |
| <b>S3</b>     | SCA3trQ78 Su(z)12 <sup>3</sup> / +            | rh1-gal4-1, P{w <sup>+mC</sup> UAS-Hsap\MJD.tr-Q78}c211.2 / Su(z)12 <sup>3</sup> , red <sup>1</sup> , e <sup>+</sup>                                                                                |             | FBst0005068                                                                                                                                                                                                            | rh1-gal4-1, P{w <sup>+mC</sup> UAS-Hsap\MJD.tr-Q78}c211.2 / TM6B, Tb                                     |   |
| <b>S3</b>     | SCA3trQ78 Su(z)12 <sup>4</sup> / +            | rh1-gal4-1, P{w <sup>+mC</sup> UAS-Hsap\MJD.tr-Q78}c211.2 / Su(z)12 <sup>4</sup> , P{FRT(w <sup>hs</sup> )}2A, e <sup>1</sup>                                                                       |             | FBst0024469                                                                                                                                                                                                            | rh1-gal4-1, P{w <sup>+mC</sup> UAS-Hsap\MJD.tr-Q78}c211.2 / TM6B, Tb                                     |   |
| <b>S3</b>     | SCA3trQ78 E(z) <sup>731</sup> / +             | rh1-gal4-1, P{w <sup>+mC</sup> UAS-Hsap\MJD.tr-Q78}c211.2 / E(z) <sup>731</sup>                                                                                                                     |             | JKC0226 w <sup>1118</sup> ;<br>E(z) <sup>731</sup> /TM6, Sb                                                                                                                                                            | rh1-gal4-1, P{w <sup>+mC</sup> UAS-Hsap\MJD.tr-Q78}c211.2 / TM6B, Tb                                     |   |
| <b>S4</b>     | wild-type Su(z)12-C-term HA                   | w <sup>1118</sup> ; P{w <sup>+mC</sup> Su(z)12 <sup>+228T:lvirHA</sup> =Su(z)12 C-termHA}L3 / +                                                                                                     |             | JKC1458 P{w <sup>+mC</sup> Su(z)12 <sup>+228T:lvirHA</sup> =Su(z)12 C-termHA}L3 / SM6A                                                                                                                                 | FBst0005905                                                                                              |   |
| <b>S4</b>     | miR-34Δ Su(z)12-C-term HA                     | w <sup>1118</sup> ; P{w <sup>+mC</sup> Su(z)12 <sup>+228T:lvirHA</sup> =Su(z)12 C-termHA}L3 / +; Df(3R) <sup>0110</sup> , P{w <sup>+mC</sup> Fmr1 <sup>1t</sup> miR-277 <sup>1t</sup> =FAFB}4       |             | JKC1438 Su(z)12 <sup>+228T:lvirHA</sup> =Su(z)12 C-termHA}L3 / SM6A ; Df(3R) <sup>0110</sup> , P{w <sup>+mC</sup> Fmr1 <sup>1t</sup> miR-277 <sup>1t</sup> =FAFB}4                                                     | Bonini 0110 Df(3R) <sup>0110</sup> , P{w <sup>+mC</sup> Fmr1 <sup>1t</sup> miR-277 <sup>1t</sup> =FAFB}4 |   |
| <b>S4</b>     | wild-type Su(z)12-C-term HA-mutant 3'UTR      | w <sup>1118</sup> ; P{w <sup>+mC</sup> Su(z)12 <sup>+235T:lvirHA</sup> =Su(z)12 C-termHA Nsil}L2 / +                                                                                                |             | JKC1459 w <sup>1118</sup> ; P{w <sup>+mC</sup> Su(z)12 <sup>+235T:lvirHA</sup> =Su(z)12 C-termHA Nsil}L2 / SM6A                                                                                                        | FBst0005905                                                                                              |   |
| <b>S4</b>     | miR-34Δ Su(z)12-C-term HA-mutant 3'UTR        | w <sup>1118</sup> ; P{w <sup>+mC</sup> Su(z)12 <sup>+235T:lvirHA</sup> =Su(z)12 C-termHA Nsil}L2 / + ; Df(3R) <sup>0110</sup> , P{w <sup>+mC</sup> Fmr1 <sup>1t</sup> miR-277 <sup>1t</sup> =FAFB}4 |             | JKC1437 w[1118]; w <sup>1118</sup> ; P{w <sup>+mC</sup> Su(z)12 <sup>+235T:lvirHA</sup> =Su(z)12 C-termHA Nsil}L2 / SM6A; Df(3R) <sup>0110</sup> , P{w <sup>+mC</sup> Fmr1 <sup>1t</sup> miR-277 <sup>1t</sup> =FAFB}4 | Bonini 0110 Df(3R) <sup>0110</sup> , P{w <sup>+mC</sup> Fmr1 <sup>1t</sup> miR-277 <sup>1t</sup> =FAFB}4 |   |
| <b>S5</b>     | wild-type                                     | w <sup>1118</sup>                                                                                                                                                                                   | FBst0005905 |                                                                                                                                                                                                                        |                                                                                                          |   |
| <b>S5</b>     | E(z)                                          | w <sup>1118</sup> ; E(z) <sup>731</sup> / E(z) <sup>61</sup>                                                                                                                                        |             | JKC0226 w <sup>1118</sup> ;<br>E(z) <sup>731</sup> /TM6, Sb                                                                                                                                                            | JKC0200 w <sup>1118</sup> ;<br>E(z) <sup>61</sup> /TM6, Sb                                               |   |
